# Supplementary material for: Effect of community attitudes on suicide mortality in South Korea: a nationwide ecological study
Source: Research Square preprint supplement (doi:10.21203/rs.3.rs-2717050/v1), 2023-03-28
Supplement: Supplementary file 1 [file 738277a33540174a7c04d2ff.pdf]

## Supplementary materials

### < Article Information >

**Title:** Effect of community attitudes on suicide mortality in South Korea: a nationwide ecological study

**Journal:** Social Psychiatry and Psychiatric Epidemiology

### Authors:

Minseok Hong<sup>a</sup>, Hyesoo Kim<sup>a</sup>, C. Hyung Keun Park<sup>b</sup>, Hyunju Lee<sup>c,d</sup>, Sang Jin Rhee<sup>c</sup>, Sooyeon Min<sup>c</sup>, Min Ji Kim<sup>a</sup>, Jeong Hun Yang<sup>c</sup>, Yoojin Song<sup>a,c</sup>, Kyunghoon Son<sup>c</sup> and Yong Min Ahn<sup>a,c,e,\*</sup>

<sup>a</sup> Department of Psychiatry, Seoul National University College of Medicine, 103 Daehak-ro, Jongno-gu, Seoul 03080, Republic of Korea

<sup>b</sup> Department of Psychiatry, Asan Medical Center, 88 Olympic-ro 43-gil, Songpa-gu, Seoul 05505, Republic of Korea

<sup>c</sup> Department of Neuropsychiatry, Seoul National University Hospital, 101 Daehak-ro, Jongno-gu, Seoul 03080, Republic of Korea

<sup>d</sup> Department of Clinical Medical Sciences, Seoul National University College of Medicine, 103 Daehak-ro, Jongno-gu, Seoul 03080, Republic of Korea

<sup>e</sup> Seoul National University Medical Research Center, Institute of Human Behavioral Medicine, 103 Daehak-ro, Jongno-gu, Seoul 03080, Republic of Korea

---

\* Corresponding author: Yong Min Ahn, Department of Neuropsychiatry, Seoul National University Hospital, 101 Daehak-ro, Jongno-gu, Seoul 03080, Republic of Korea. Tel.: +82 2 2072 2457, Fax: +82 2 744 7241, Email: aym@snu.ac.kr

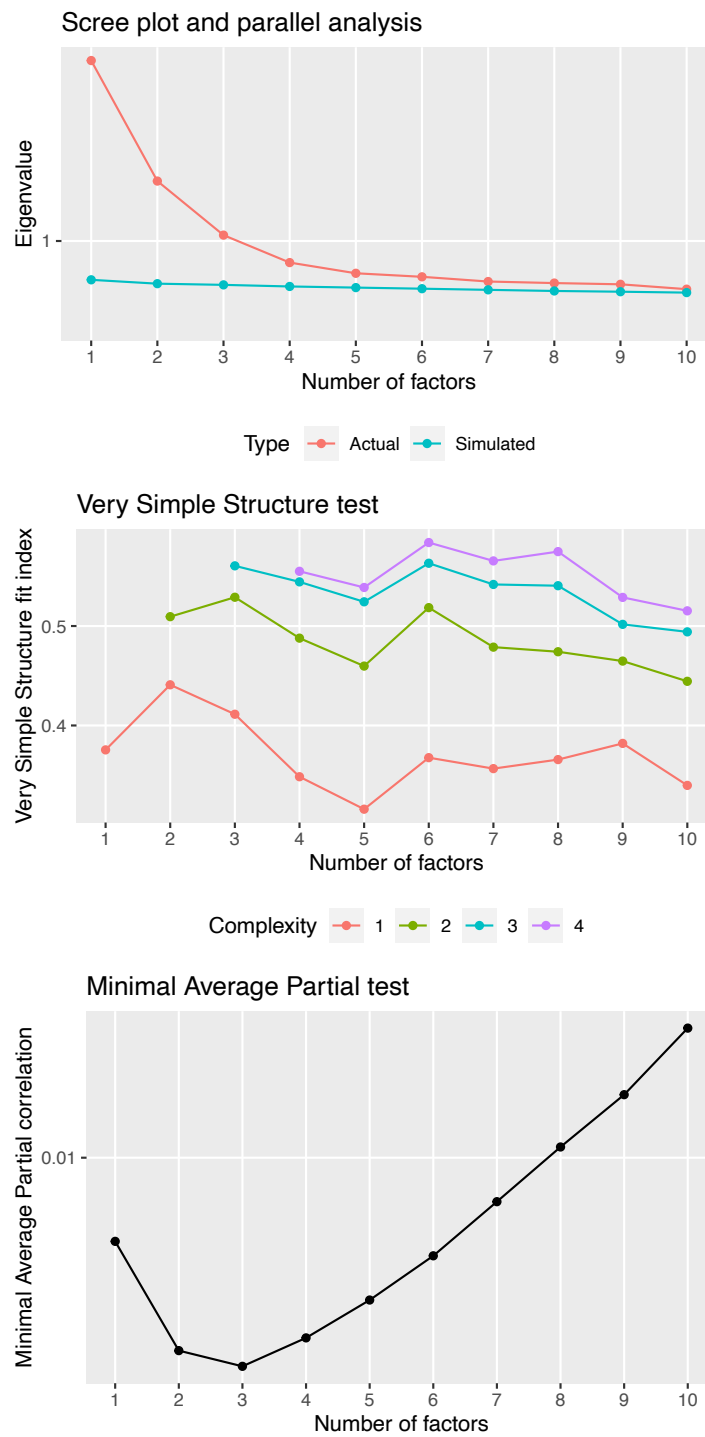

**Supplementary Fig. 1** Determination of the number of factors. The eigenvalue (top graph) decreased below 1 after three factors, while parallel analysis suggested more than 10 factors. The very simple structure test (middle graph) did not produce a single prominent peak, although values for two to three factors were comparatively higher. The minimal average partial correlation test (bottom graph) exhibited its lowest point at three factors. Based on these findings, it is reasonable to determine the number of factors as three.

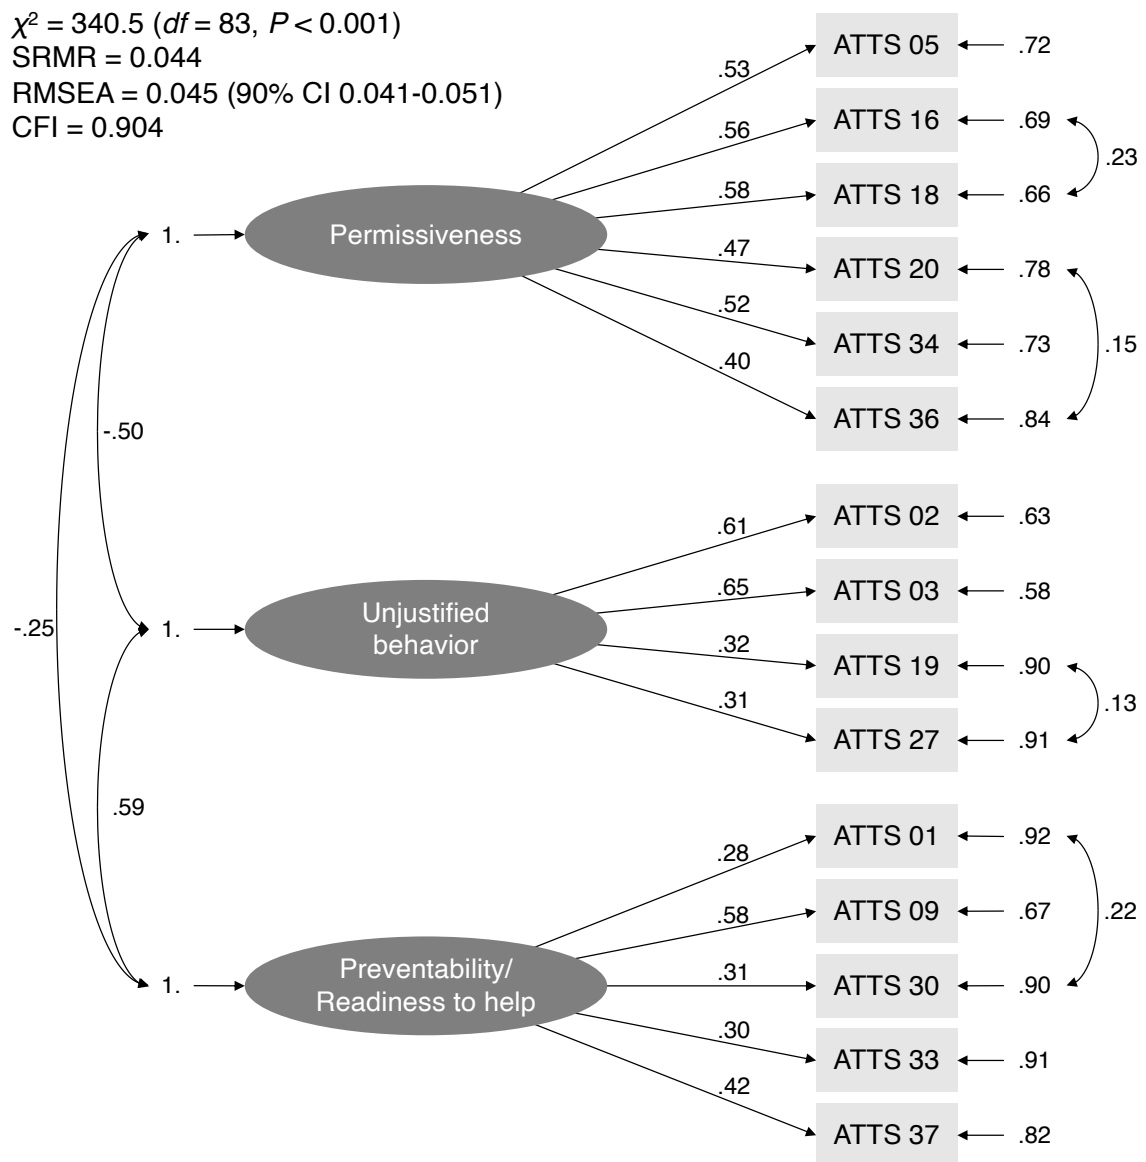

**Supplementary Fig. 2** Path diagram of the confirmatory factor analysis. *df* degree of freedom, *SRMR* standardized root mean square residual, *RMSEA* root mean square error of approximation, *CFI* comparative fit index.

| Region           | Number of participants | Mean age | Older adults | Female | Suicide rate |
|------------------|------------------------|----------|--------------|--------|--------------|
| Chungnam         | 60                     | 46.1     | 19.5%        | 47.4%  | 36.7         |
| Jeju             | 40                     | 45.2     | 16.7%        | 48.5%  | 35.6         |
| Gangwon          | 50                     | 46.7     | 21.7%        | 48.3%  | 33.9         |
| Gyeongbuk-South  | 40                     | 44.0     | 18.5%        | 49.3%  | 33.9         |
| Gyeongnam-East   | 50                     | 43.5     | 19.9%        | 55.8%  | 33.6         |
| Jeonbuk          | 60                     | 45.7     | 21.7%        | 48.9%  | 33.6         |
| Chungbuk         | 50                     | 44.0     | 19.1%        | 48.1%  | 33.1         |
| Gyeongnam-West   | 50                     | 51.7     | 31.5%        | 39.1%  | 32.8         |
| Incheon-South    | 41                     | 45.4     | 15.6%        | 51.0%  | 32.0         |
| Jeonnam          | 60                     | 47.4     | 22.3%        | 48.0%  | 31.8         |
| Gyeongbuk-North  | 40                     | 52.0     | 31.8%        | 47.0%  | 31.8         |
| Ulsan            | 40                     | 44.0     | 15.2%        | 47.5%  | 31.7         |
| Busan-West       | 60                     | 47.9     | 23.0%        | 52.5%  | 31.5         |
| Busan-East       | 40                     | 50.5     | 30.7%        | 47.4%  | 31.0         |
| Daejeon          | 50                     | 43.9     | 15.9%        | 49.4%  | 30.8         |
| Daegu            | 70                     | 47.3     | 23.0%        | 50.0%  | 30.6         |
| Incheon-North    | 40                     | 43.3     | 18.3%        | 47.3%  | 29.6         |
| Gyeonggi-Middle2 | 70                     | 44.1     | 16.0%        | 50.5%  | 29.6         |
| Gyeonggi-North   | 60                     | 45.9     | 18.3%        | 47.8%  | 28.7         |
| Gwangju          | 40                     | 44.8     | 18.6%        | 49.9%  | 27.9         |
| Gyeonggi-South2  | 49                     | 43.9     | 14.8%        | 50.4%  | 26.6         |
| Seoul-Northeast1 | 40                     | 44.8     | 20.4%        | 50.4%  | 26.3         |
| Sejong           | 30                     | 44.7     | 16.7%        | 49.0%  | 26.2         |
| Seoul-Northeast2 | 40                     | 44.4     | 18.2%        | 50.6%  | 24.3         |
| Gyeonggi-South2  | 70                     | 43.5     | 12.8%        | 45.4%  | 23.9         |
| Seoul-Southwest1 | 40                     | 44.3     | 18.2%        | 50.6%  | 23.4         |
| Seoul-Southwest2 | 40                     | 43.3     | 16.0%        | 50.4%  | 23.0         |
| Seoul-Southeast  | 60                     | 43.8     | 16.8%        | 52.0%  | 22.9         |
| Seoul-Northwest  | 50                     | 45.0     | 18.2%        | 52.2%  | 22.3         |
| Gyeonggi-Middle1 | 70                     | 45.1     | 18.2%        | 49.7%  | 21.9         |

**Supplementary Table 1.** Regional demographic characteristics and suicide rates. Regions are displayed in descending order of suicide rate per 100,000 people.

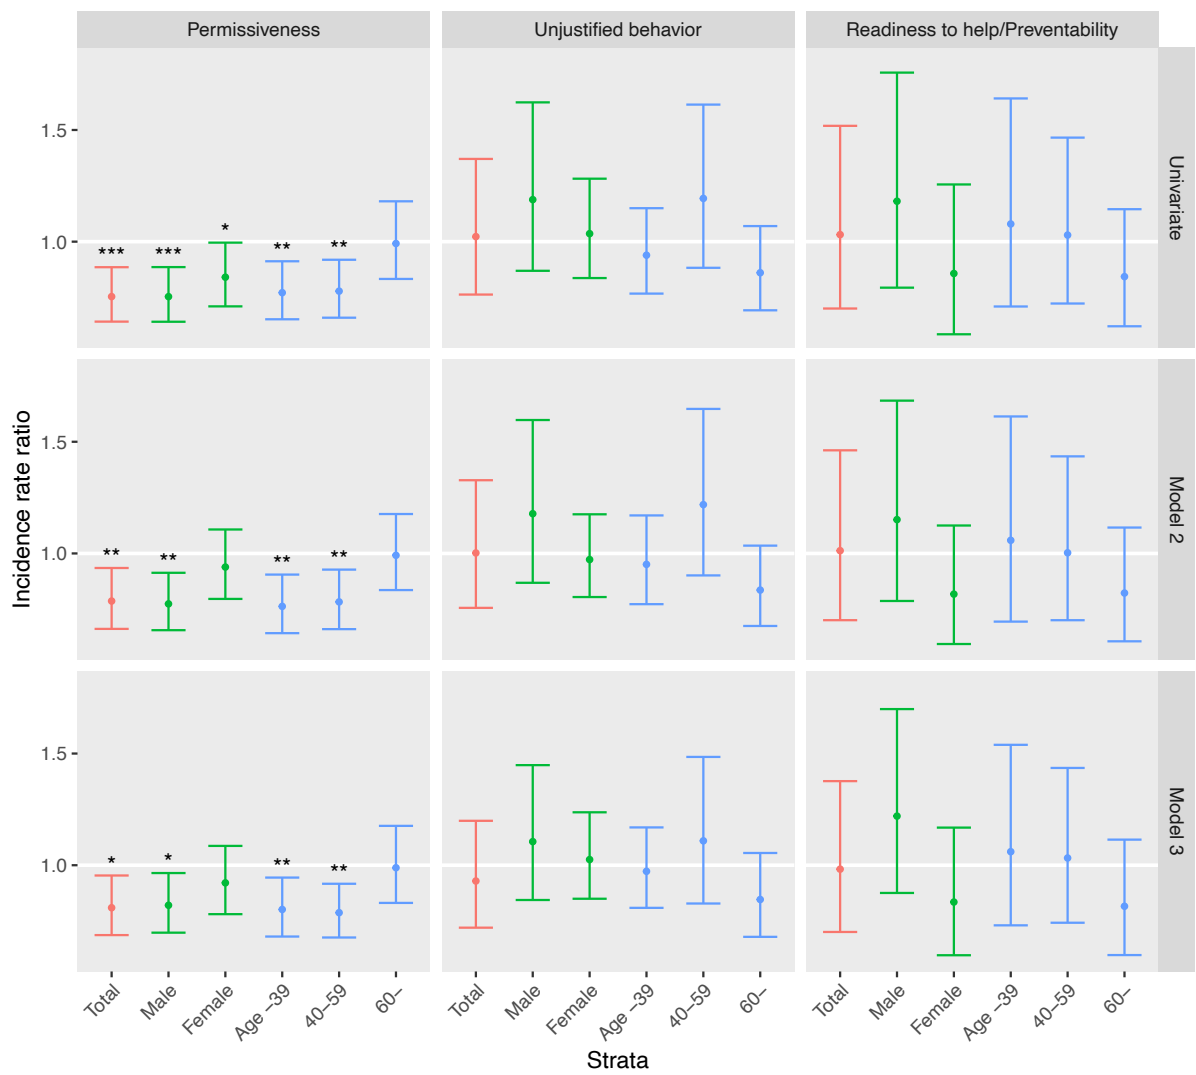

**Supplementary Fig. 3** Stratified analysis replicated in univariate and multivariate models. (Result of Model 1 can be found in Fig 2).
